# Supplementary figures and images for: Synergistic effect of Ag@CN with BiVO4 in a unique Z-type heterojunction for enhancing photoelectrochemical water splitting performance
Source: Royal Society of Chemistry journal article supplement (doi:10.1039/d4cp00679h), 2024-01-01

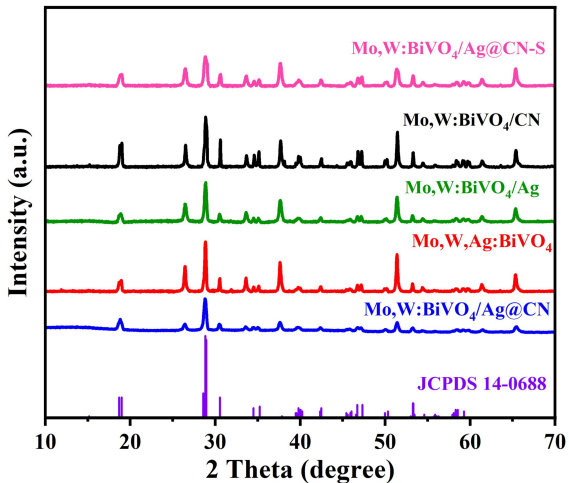

Supplement: d4cp00679h2.pdf [file d4cp00679h2.pdf]

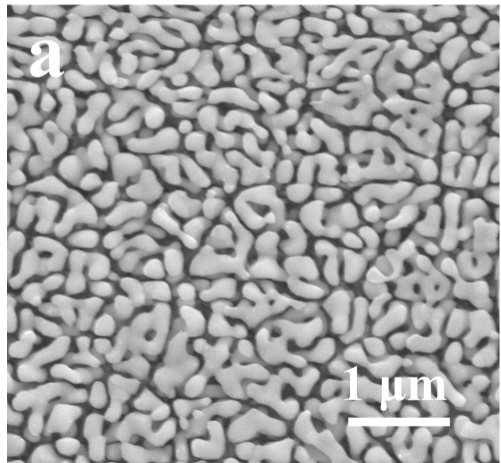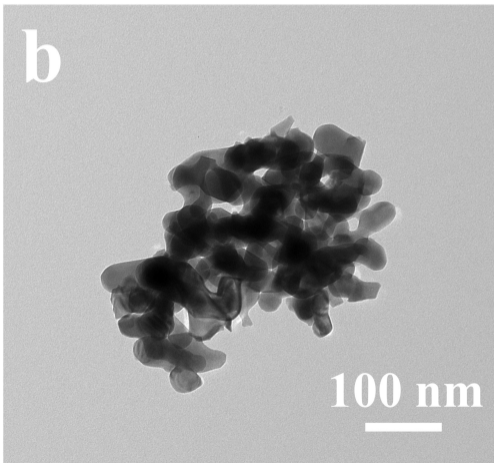

Supplement: d4cp00679h3.pdf [file d4cp00679h3.pdf]

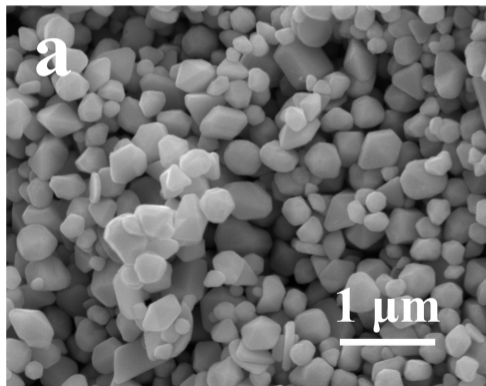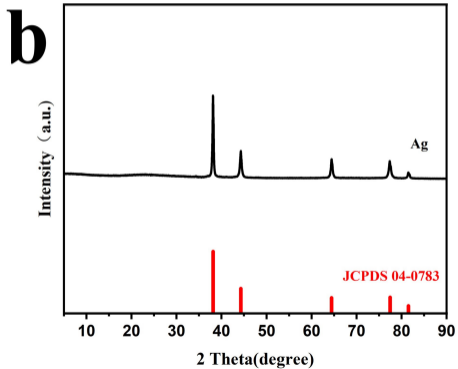

Supplement: d4cp00679h4.pdf [file d4cp00679h4.pdf]

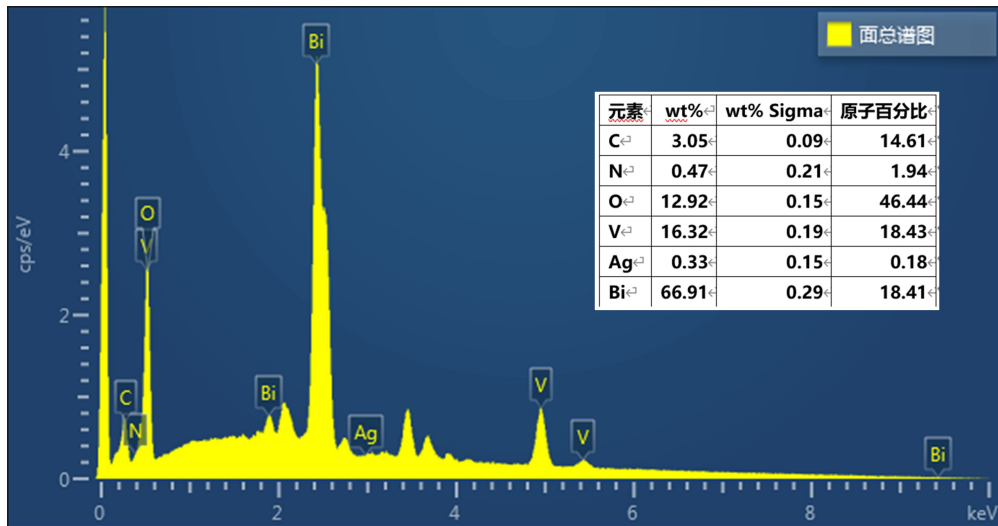

Supplement: d4cp00679h5.pdf [file d4cp00679h5.pdf]

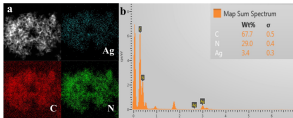

Supplement: d4cp00679h6.pdf [file d4cp00679h6.pdf]

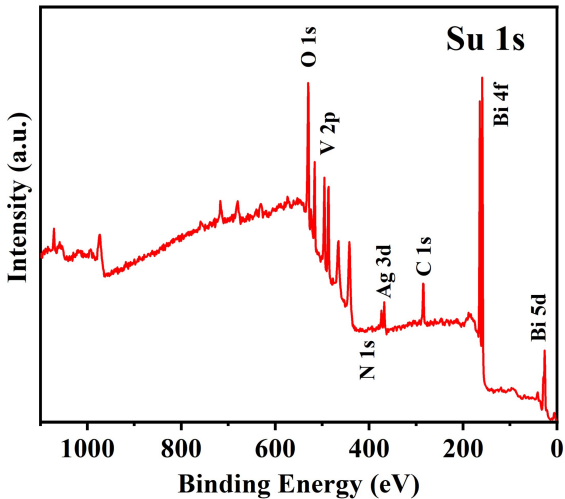

Supplement: d4cp00679h7.pdf [file d4cp00679h7.pdf]

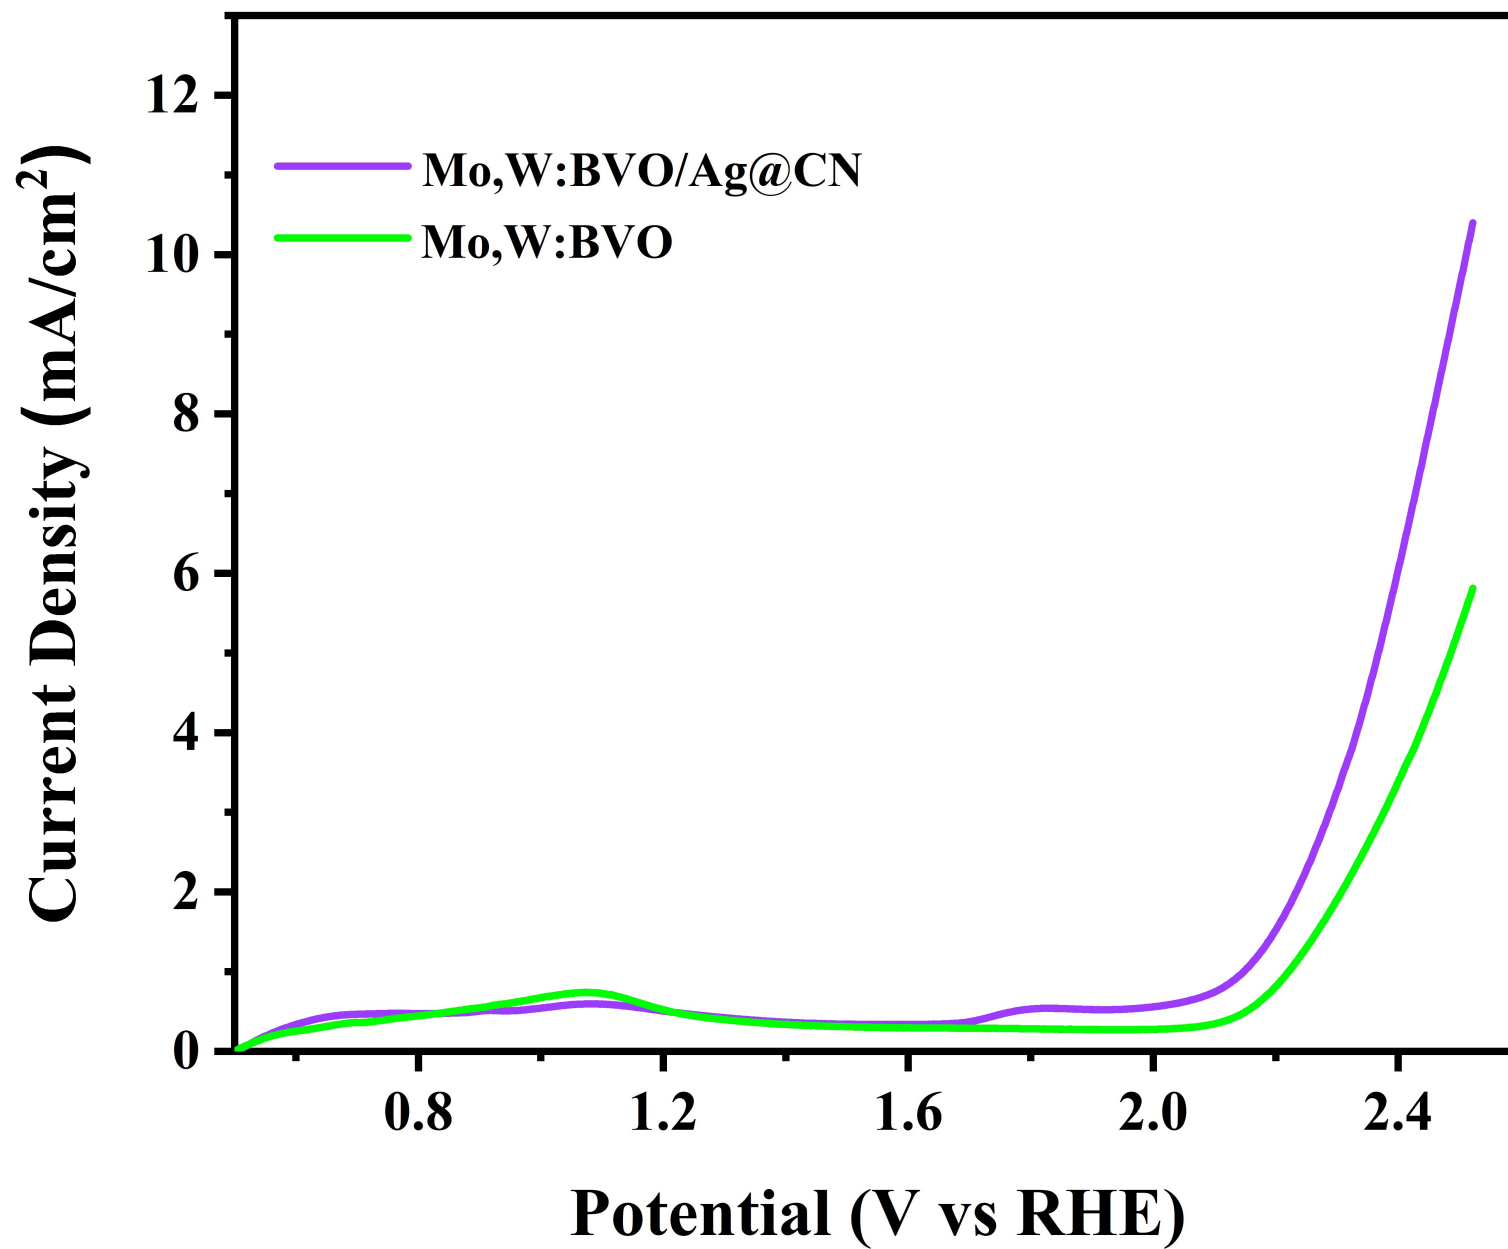

Supplement: d4cp00679h8.pdf [file d4cp00679h8.pdf]

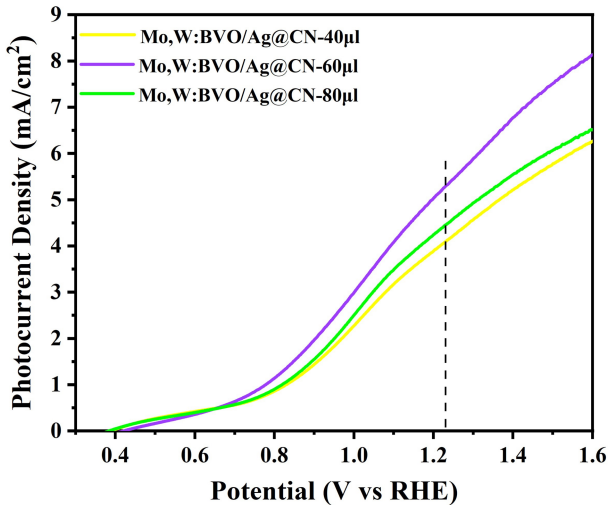

Supplement: d4cp00679h9.pdf [file d4cp00679h9.pdf]
